# Supplementary material for: Thermal and mechanical reinforcement of a novel paraffin-based hydroxyl-terminated polybutadiene (HTPB) binder containing a three-dimension (3D) diurea–paraffin wax (DU–PW) for prevention of PW leakage
Source: Royal Society of Chemistry journal article supplement (doi:10.1039/c7ra10574f), 2018-01-01
Supplement: c7ra10574f1.pdf [file c7ra10574f1.pdf]

## Supporting Information

### Thermal and mechanical reinforcement of a novel paraffin-based HTPB binder containing 3D diurea-paraffin wax (DU-PW) PCM for prevention of PW leakage

Xia Gao<sup>a,b</sup>, Tianbo Zhao<sup>a,\*</sup>, Guan Luo<sup>b</sup>, Baohui Zheng<sup>b</sup>, Hui Huang<sup>b</sup>, Xue Han<sup>a</sup>, Rui Ma<sup>a</sup>, Yuqiao Chai<sup>a</sup>

<sup>a</sup>Key Laboratory of Cluster Science of Ministry of Education, Beijing Institute of Technology, Beijing 100081, PR China

<sup>b</sup>Institute of Chemical Materials, China Academy of Engineering Physics (CAEP), Mianyang 621900, PR China

\*Corresponding author. Tel.: +86-10-81381389  
E-mail address: bit\_bipt@126.com

#### Notes and references

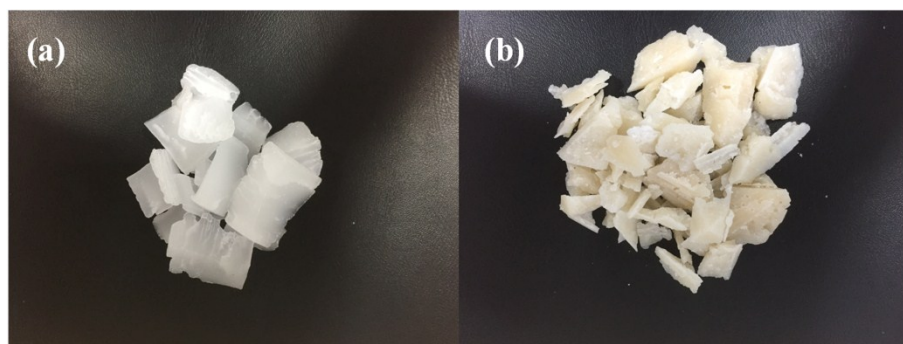

**Fig. S1.** Photographs of (a) pristine PW, (b) DU-PW composite.

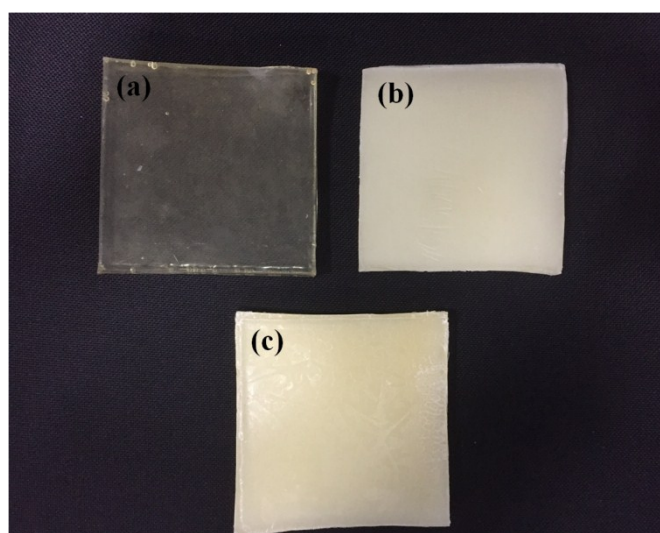

**Fig. S2.** Photographs of (a) pristine HTPB, (b) PW/HTPB composite, (c) DU-PW/HTPB composite.

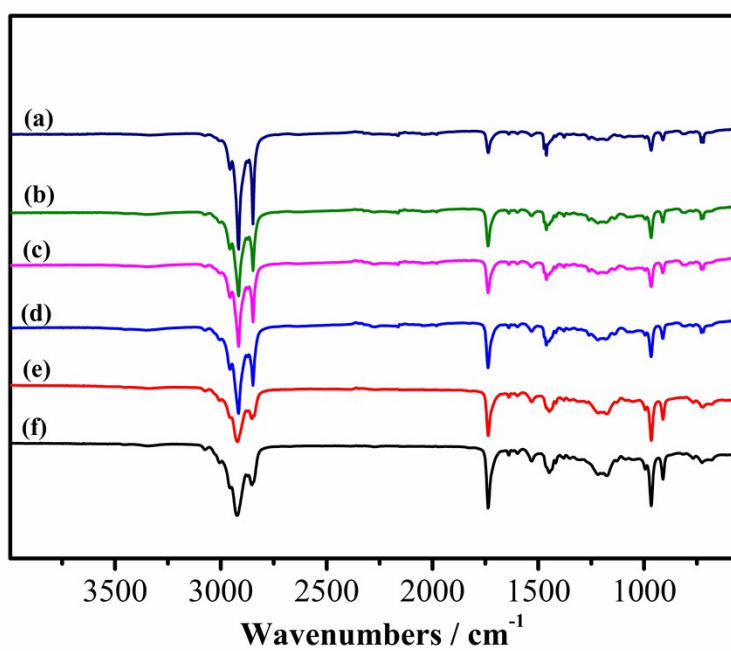

**Fig. S3.** FT-IR spectrum of (a) DU-PW/HTPB composite, (b) 60 wt% DU-PW/PW/HTPB, (c) 40wt% DU-PW/PW/HTPB, (d) 20 wt% DU-PW/PW/HTPB, (e) PW/HTPB composite and (f) pristine HTPB.

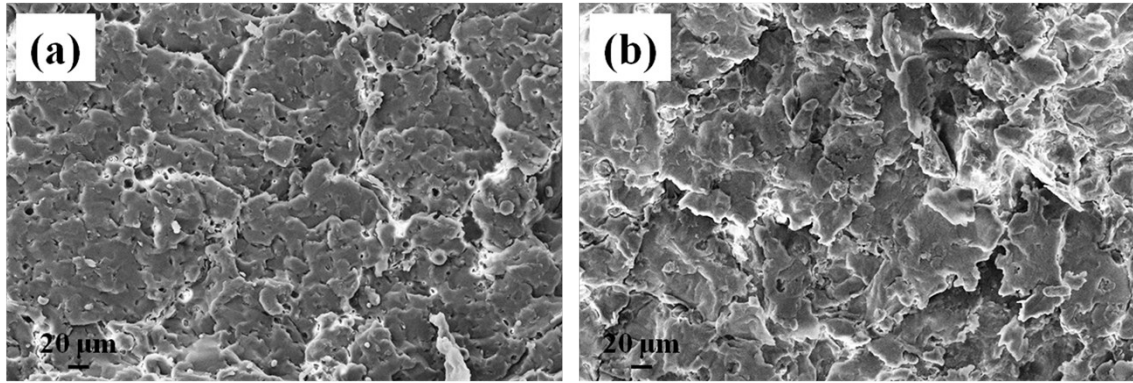

**Fig. S4.** SEM photographs of (a) 20 wt% DU-PW/PW/HTPB, (b) 40 wt% DU-PW/PW/HTPB composites.

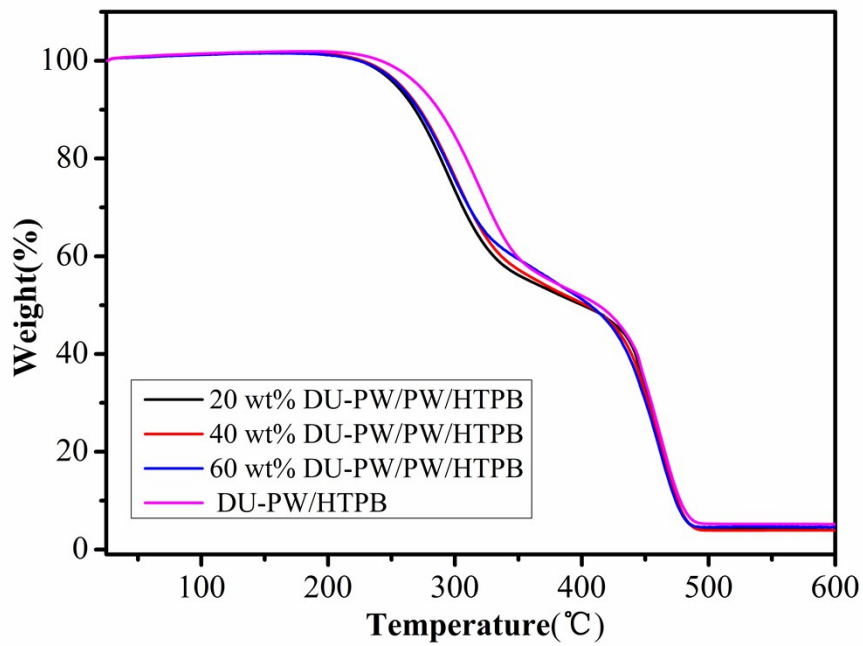

**Fig. S5.** TGA curves of 20 wt% DU-PW/PW/HTPB, 40 wt% DU-PW/PW/HTPB, 60 wt% DU-PW/PW/HTPB and DU-PW/HTPB composites.

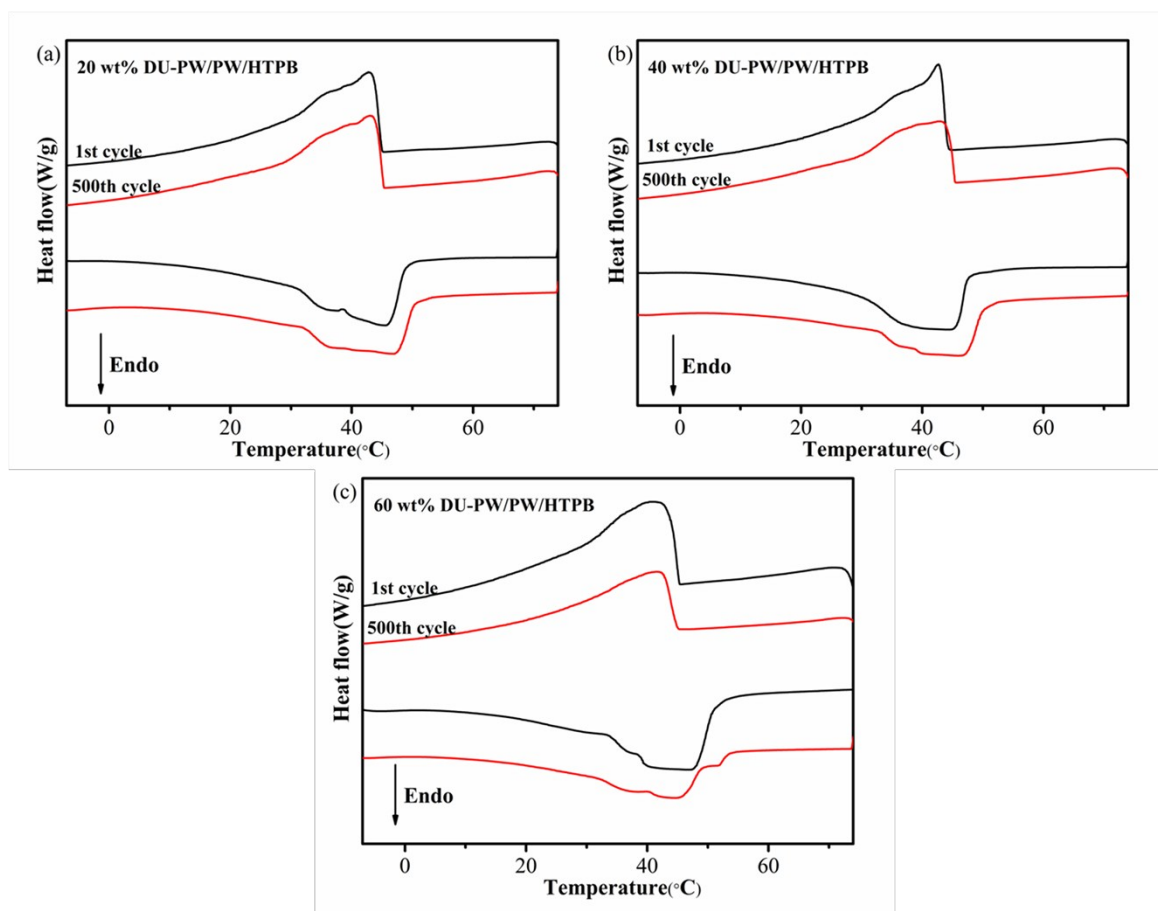

**Fig. S6.** DSC curves of (a) 20 wt% DU-PW/PW/HTPB, (b) 40 wt% DU-PW/PW/HTPB, (c) 60 wt% DU-PW/PW/HTPB composites before and after 500-thermal-cycle test.

Table S1. The recipe of DU-PW/PW/HTPB composites.

| Samples              | PW (g) | DU-PW (g) |
|----------------------|--------|-----------|
| HTPB                 | 0      | 0         |
| PW/HTPB              | 125    | 0         |
| 20 wt% DU-PW/PW/HTPB | 100    | 25        |
| 40 wt% DU-PW/PW/HTPB | 75     | 50        |
| 60 wt% DU-PW/PW/HTPB | 50     | 75        |
| DU-PW/HTPB           | 0      | 125       |

Table S2. DSC analysis data of PW, DU-PW, pristine HTPB and DU-PW/PW/HTPB composites with different contents of DU-PW.

| Samples | Melting process |              | Freezing process |              | $\Delta T_s^a$<br>(°C) | $\Delta H_1^b$<br>(J/g) | $\Delta H_2^c$<br>(J/g) | Error <sup>d</sup><br>(%) |
|---------|-----------------|--------------|------------------|--------------|------------------------|-------------------------|-------------------------|---------------------------|
|         | $T_m$           | $\Delta H_m$ | $T_c$            | $\Delta H_c$ |                        |                         |                         |                           |
|         | (°C)            | (J/g)        | (°C)             | (J/g)        |                        |                         |                         |                           |

|                      |       |        |       |        |      |        |       |       |   |
|----------------------|-------|--------|-------|--------|------|--------|-------|-------|---|
| HTPB                 | —     | —      | —     | —      | —    | —      | —     | —     | — |
| PW                   | 49.61 | 167.80 | 48.35 | 168.10 | 1.26 | 167.95 | —     | —     | — |
| DU-PW                | 52.45 | 143.23 | 49.55 | 144.30 | 2.90 | 143.77 | —     | —     | — |
| PW/HTPB              | 46.29 | 30.22  | 42.08 | 32.19  | 4.21 | 31.21  | 33.59 | 7.09  | — |
| 20 wt% DU-PW/PW/HTPB | 45.62 | 32.31  | 42.74 | 33.81  | 2.88 | 33.06  | 32.62 | -1.35 | — |
| 40 wt% DU-PW/PW/HTPB | 44.41 | 30.29  | 42.68 | 32.20  | 1.73 | 31.26  | 31.66 | 1.26  | — |
| 60 wt% DU-PW/PW/HTPB | 43.40 | 28.52  | 42.74 | 30.47  | 0.66 | 29.50  | 30.69 | 3.88  | — |
| DU-PW/HTPB           | 44.64 | 27.14  | 41.55 | 29.28  | 3.09 | 28.21  | 28.75 | 1.88  | — |

a:  $\Delta T_s = T_c - T_m$ . b:  $\Delta H_f = (\Delta H_c + \Delta H_m)/2$ . c: Calculated enthalpy from the contents of the DU-PW/PW/HTPB composite. d: Error % =  $(\Delta H_2 - \Delta H_1)/\Delta H_2$ .
